# Supplementary material
Source: publisher figshare collection journal article supplement (https://frontiersin.figshare.com/ndownloader/files/14662247)
Supplement: Supplementary file 1 [file 14662247]

## Sheet: Page 1
Table 2 | Statistically significant DE genes for BSL male vs female subcohort analysis.
Gene #	Gene	Log2 Fold change at 50th percentile (female:male, smoothing factor 0.0001)	P value for 50th percentile rank-sum test	Log2 Fold change at 75th percentile (female:male, smoothing factor 0.0001)	P value for 75th percentile rank-sum test	Normalized entropy	Pearsons R (male age with TPM)	Pearsons R (fem age with TPM)		Gene #	Gene	Log2 Fold change at 50th percentile (female:male, smoothing factor 0.0001)	P value for 50th percentile rank-sum test	Log2 Fold change at 75th percentile (female:male, smoothing factor 0.0001)	P value for 75th percentile rank-sum test	Normalized entropy	Pearsons R (male age with TPM)	Pearsons R (fem age with TPM)
		Thresholds : > 0.26, or < -0.26	BHP based p-value threshold for 0.05 FDR : 2.38E-04	Thresholds : > 0.26, or < -0.26	BHP based p-value threshold for 0.05 FDR : 3.50E-03	Normalized entropy threshold: < 0.9895	Pearsons R threshold > 0.20 or < -0.20	Same threshold used as in male dataset				Thresholds : > 0.26, or < -0.26	BHP based p-value threshold for 0.05 FDR : 2.38E-04	Thresholds : > 0.26, or < -0.26	BHP based p-value threshold for 0.05 FDR : 3.50E-03	Normalized entropy threshold: < 0.9895	Pearsons R 0.05 FDR threshold (> 0.20 or < -0.20)	Same threshold used as in male dataset
1	ZFX	0.5873	1.27919e-31	0.588071	1.42327e-18	0.988941	0.163927	-0.133242		41	TF	0.201322	0.0271816	0.351256	0.000548891	0.962489	0.11003	0.0313723
2	EIF1AX	0.586473	4.35827e-29	0.579458	3.89563e-19	0.988793	-0.0715591	-0.193346		42	C5orf64	0.271658	0.0310931	0.295527	0.000338407	0.961856	-0.145851	0.0532749
3	KDM6A	0.645512	2.142e-25	0.576337	3.24371e-17	0.985912	0.266958	0.131632		43	MOV10L1	0.192958	0.0403804	0.322828	0.000796154	0.954261	-0.0730826	0.0177059
4	RPS4X	0.526963	1.62076e-15	0.555944	6.71657e-17	0.983812	-0.085597	-0.00866361		44	TMEM125	0.668684	0.0452922	0.290927	0.00246121	0.865187	0.0134739	-0.158605
5	MAP7D2	1.39931	2.01633e-14	1.47954	1.25302e-15	0.906462	0.00722071	-0.0563308		45	CD8B	0.158018	0.071581	0.35072	0.000275377	0.952999	0.127181	0.124878
6	DDX3X	0.553486	2.06716e-13	0.525976	5.71032e-16	0.980308	0.233395	-0.157501		46	C17orf97	0.371341	0.0752841	0.295203	0.00225214	0.916197	-0.0275252	0.0908007
7	OFD1	0.499739	2.39668e-12	0.414385	2.84394e-15	0.986226	0.081149	0.167527		47	KCNRG	0.171818	NA	-0.506882	0.00159754	0.862973	0.0634289	-0.0753006
8	PNPLA4	0.367135	2.49594e-12	0.338131	5.6267e-15	0.98867	-0.104644	-0.0462778		48	ATAD3C	-0.265137	0.26998	-0.397363	0.00135315	0.942783	0.16001	-0.0181099
9	EIF2S3	0.399005	2.52009e-09	0.44862	2.37872e-12	0.984298	0.313767	0.101737		49	ASB8	-0.0832972	0.26027	-0.27699	0.000324811	0.981477	0.230419	0.0706858
10	TXLNG	0.33504	1.83507e-08	0.392088	5.73167e-11	0.985908	0.0791257	0.000826093		50	CYP4A22	-0.0106668	0.210342	-0.313242	0.00108079	0.943129	0.0554222	0.0594012
11	PRSS16	0.915011	2.4412e-07	0.572329	8.43736e-09	0.847942	0.0421942	0.0209163		51	UBBP4	-0.145763	0.204203	-0.268101	0.000538107	0.953349	0.0488375	-0.179874
12	CA5B	0.336513	7.8327e-07	0.265821	3.26687e-07	0.981105	0.142723	-0.172117		52	REEP1	-0.163666	0.188471	-0.29058	0.00112234	0.959975	-0.0350596	-0.163633
13	ZRSR2	0.634642	7.35562e-06	0.425461	2.13089e-07	0.961423	0.108063	-0.042989		53	ISLR2	-0.09262	0.180949	-0.28666	0.00135315	0.955874	0.12264	-0.106062
14	SEZ6L2	0.343368	1.33454e-05	0.284725	7.13341e-07	0.975888	-0.189895	-0.0420928		54	RARRES1	-0.307214	0.162267	-0.653584	0.00116537	0.862114	-0.259366	-0.250706
15	PRKX	0.433946	2.5917e-05	0.284093	2.65591e-06	0.977301	0.140607	0.0777941		55	GMCL1	-0.170366	0.138406	-0.284276	0.000180876	0.958806	0.226643	-0.119029
16	CPZ	0.72613	8.3549e-05	0.568779	5.56296e-07	0.916434	0.013444	0.257489		56	FLT1	-0.816158	0.0939097	-0.400489	0.00143049	0.886403	0.17549	-0.0921539
17	ASMT	0.540281	0.00013324	0.317592	2.16864e-05	0.949418	-0.106479	-0.0322183		57	STRA6	-0.103417	0.0906567	-0.303169	0.000780911	0.968379	0.350219	0.158083
18	SNRPG	0.487415	0.000203749	0.324964	0.00112234	0.970221	-0.243054	0.154404		58	ADCY1	-0.181435	0.0895787	-0.320731	0.00151189	0.955186	0.0259019	0.131902
19	MCOLN3	0.350099	0.000238263	0.328601	2.94999e-05	0.973007	-0.143588	-0.0911903		59	DHRS3	-0.256745	0.0874535	-0.299718	0.000214271	0.960634	0.136003	0.0258557
20	SLC27A6	0.301629	0.000484863	0.391079	2.67836e-07	0.975979	-0.350251	-0.191106		60	CCL2	-0.220104	0.0853692	-0.44187	0.00354755	0.893824	-0.0598746	0.127269
21	PGBD5	0.288703	0.000562215	0.332179	2.01866e-05	0.972202	-0.223587	0.0629201		61	MUSTN1	-0.382851	0.0783885	-0.37538	1.37172e-05	0.954347	-0.1167	-0.305795
22	CD3G	0.652683	0.000816986	0.26328	0.000751234	0.935791	0.146697	-0.0342899		62	SRRM3	-0.122147	0.0764817	-0.31036	6.36035e-06	0.981376	-0.0275935	-0.0951834
23	GYG2	0.720817	0.000955171	0.671787	2.32956e-06	0.904263	-0.0974982	-0.250923		63	CAMK1G	-0.4411	0.0764811	-0.479251	0.00298506	0.832197	-0.177865	-0.0813394
24	IGSF10	0.468645	0.00184519	0.285261	0.00135315	0.934838	-0.0266123	-0.0665732		64	SHH	-0.23571	0.0654036	-0.373735	0.000559875	0.949534	0.33338	0.241222
25	SULF1	0.194001	0.00237915	0.272665	0.000237997	0.981111	-0.204607	-0.304518		65	COMP	-0.536813	0.0616233	-0.859814	7.2126e-06	0.886156	-0.0185432	-0.149766
26	CD2	0.355952	0.00269598	0.285655	0.000155732	0.952217	0.144395	0.154802		66	LZTS1	-0.268894	0.0601884	-0.316844	0.00217316	0.960657	0.257114	0.188376
27	MEGF11	0.81285	0.00396249	0.375266	0.000233063	0.931577	-0.327719	-0.187496		67	RALGPS2	-0.176617	0.0579001	-0.359314	0.000120116	0.973046	0.237424	-0.00641702
28	TMEM97	0.444025	0.00466718	0.376695	0.00052752	0.941931	-0.157268	-0.0292271		68	SCRG1	-0.255907	0.0550619	-0.554668	0.00100192	0.92923	-0.118469	0.122765
29	DRP2	0.320663	0.00548659	0.265215	4.80235e-05	0.97723	-0.390278	-0.233245		69	NXPH3	-0.110715	0.0521491	-0.297958	0.000324811	0.96743	0.0828683	-0.126226
30	GPR64	0.449277	0.00568143	0.438657	0.00162707	0.94328	-0.175671	-0.14137		70	DMRTC1B	-0.441297	0.0507871	-0.472264	0.000414742	0.908373	0.199385	0.0398005
31	KRT4	0.994344	0.00682591	0.568583	0.000112497	0.808612	-0.121262	-0.170865		71	C4A	-0.17295	0.0501195	-0.329477	5.14352e-05	0.974135	0.0663107	0.180323
32	GLYAT	0.47	0.00702685	0.385938	0.000367211	0.941115	-0.110264	-0.149331		72	PDGFRA	-0.0873369	0.0490208	-0.299068	0.000359802	0.978754	0.0630504	-0.207299
33	MORN2	0.289778	0.0106053	0.353965	3.5568e-05	0.952964	-0.0282078	-0.00394528		73	LRRC16B	-0.196729	0.0468839	-0.310221	0.000506928	0.960943	-0.0736589	0.165474
34	GIPR	0.450332	0.0153981	0.411571	0.00066837	0.934875	-0.0353156	-0.15117		74	GRIK3	-0.235523	0.0400121	-0.498966	0.000630203	0.929817	0.29912	0.257327
35	NCAPH	0.424506	0.0189053	0.498441	2.06752e-05	0.941246	-0.059834	-0.0621379		75	TANGO6	-0.366897	0.0387143	-0.284942	0.00209673	0.925195	-0.0112329	0.00117797
36	CD3E	0.241721	0.0204097	0.282609	0.00202278	0.952344	0.133865	0.110057		76	WWC3	-0.306163	0.0309455	-0.355327	0.00116537	0.944251	0.0194092	-0.0177684
37	SP4	1.71686	0.0208206	0.44016	0.000440607	0.854884	-0.0573509	-0.0227952		77	FST	-0.129119	0.029644	-0.349777	3.72606e-05	0.965132	-0.165462	0.250175
38	SPRR3	0.66415	0.0209506	0.686185	0.000571065	0.694929	-0.0690719	-0.140738		78	RNF165	-0.319828	0.0286645	-0.413068	0.000324811	0.960364	0.00526481	-0.0262151
39	DSC3	0.527444	0.0214616	0.338593	0.00159754	0.895137	0.114304	0.0427336		79	CPAMD8	-0.171896	0.0281174	-0.326395	1.37172e-05	0.967152	-0.136208	-0.278116
40	FH	0.283956	0.0263284	0.353011	3.31653e-05	0.955579	0.0644456	0.0764935		80	TMEM255A	-0.138413	0.025143	-0.421034	3.02007e-05	0.960146	0.324334	0.0821766

## Sheet: Page 2
Table 2 | Continued
Gene #	Gene	Log2 Fold change at 50th percentile (female:male, smoothing factor 0.0001)	P value for 50th percentile rank-sum test	Log2 Fold change at 75th percentile (female:male, smoothing factor 0.0001)	P value for 75th percentile rank-sum test	Normalized entropy	Pearsons R (male age with TPM)	Pearsons R (fem age with TPM)		Gene #	Gene	Log2 Fold change at 50th percentile (female:male, smoothing factor 0.0001)	P value for 50th percentile rank-sum test	Log2 Fold change at 75th percentile (female:male, smoothing factor 0.0001)	P value for 75th percentile rank-sum test	Normalized entropy	Pearsons R (male age with TPM)	Pearsons R (fem age with TPM)
		Thresholds : > 0.26, or < -0.26	BHP based p-value threshold for 0.05 FDR : 2.38E-04	Thresholds : > 0.26, or < -0.26	BHP based p-value threshold for 0.05 FDR : 3.50E-03	Normalized entropy threshold: < 0.9895	Pearsons R threshold > 0.20 or < -0.20	Same threshold used as in male dataset				Thresholds : > 0.26, or < -0.26	BHP based p-value threshold for 0.05 FDR : 2.38E-04	Thresholds : > 0.26, or < -0.26	BHP based p-value threshold for 0.05 FDR : 3.50E-03	Normalized entropy threshold: < 0.9895	Pearsons R 0.05 FDR threshold (> 0.20 or < -0.20)	Same threshold used as in male dataset
81	CA8	-0.324743	0.0246546	-0.268525	0.000458679	0.964532	-0.0498058	-0.0851796		116	PMEPA1	-0.184202	0.000768204	-0.3342	5.20646e-08	0.977673	0.236407	0.113697
82	FABP7	-0.372002	0.0245668	-0.458622	0.000431823	0.898793	0.140166	0.197253		117	HBA2	-0.862775	0.000588778	-0.871956	0.000162558	0.781423	-0.180657	-0.173458
83	PDE4C	-0.301993	0.0235855	-0.400571	4.12642e-06	0.95341	0.114779	-0.082404		118	ICAM5	-0.337297	0.000574159	-0.474699	7.97197e-06	0.954676	-0.0594301	0.014562
84	NOTCH1	-0.151601	0.0205126	-0.320138	0.000538107	0.966833	0.154523	0.0195836		119	PLCXD1	-0.395929	0.000516712	-0.358925	7.2126e-06	0.968255	0.192466	0.0282008
85	C1orf101	-0.298606	0.0204097	-0.305834	0.000338407	0.970089	0.15958	0.0753672		120	DDX43	-0.559486	0.000402245	-0.477658	3.0259e-06	0.934844	0.0894359	0.0302478
86	HP	-0.58043	0.0194046	-0.931066	8.17343e-06	0.788782	0.0159861	0.0695936		121	PPP2R3B	-0.52071	0.000196254	-0.34811	5.02732e-05	0.972419	0.314089	0.210788
87	KIAA1279	-12.6009	0.0182688	-0.713543	9.22369e-05	0.814301	0.132488	-0.147856		122	OOEP	-0.593956	0.000139942	-0.498393	6.0452e-07	0.941983	-0.0123234	-0.0417544
88	DIO2	-0.384764	0.0172555	-0.423795	0.00104067	0.947112	0.123642	0.0846865		123	AGAP2	-0.42118	0.000139528	-0.446016	1.64407e-07	0.956968	0.0843286	0.133439
89	SSC5D	-0.243423	0.0161355	-0.309804	0.0025497	0.961887	0.208951	0.0111509		124	MMEL1	-0.527504	0.000127247	-0.313051	3.81354e-05	0.968965	-0.0279111	0.0902241
90	PTPN9	-0.202471	0.015969	-0.29815	3.6405e-05	0.972522	0.195448	-0.108939		125	NTRK1	-0.57699	0.00011072	-0.593932	4.90275e-08	0.95726	-0.00940473	0.0818277
91	TPPP2	-0.285216	0.0130008	-0.343531	0.000114985	0.919396	0.0816416	-0.0347803		126	SEL1L2	-1.73064	0.000108172	-0.82858	1.54892e-05	0.888904	-0.0288414	-0.225758
92	FAM228A	-0.397639	0.0126733	-0.372645	0.000209801	0.921559	-0.0766259	0.0818639		127	PTGFR	-0.338853	6.53297e-05	-0.433561	4.47914e-08	0.978071	-0.102017	-0.132134
93	ADAMTS8	-0.215724	0.0122693	-0.452252	9.12675e-07	0.963245	0.0721802	0.24721		128	WISP2	-0.648179	3.35451e-05	-0.524366	2.09656e-06	0.96341	-0.0337856	0.122999
94	ANKFN1	-0.377272	0.0116279	-0.30259	0.000155732	0.942082	0.0419251	0.113224		129	SV2A	-0.364228	2.46453e-05	-0.232466	4.93588e-06	0.979233	-0.0331831	-0.115661
95	VWA3B	-0.377153	0.0110763	-0.29094	0.00184824	0.955041	0.156871	0.0440802		130	KCND3	-0.337796	2.13565e-05	-0.547011	7.67428e-08	0.969609	-0.156264	-0.108123
96	EFCAB5	-0.424033	0.00914571	-0.291362	0.00202278	0.951673	0.219513	0.0503771		131	DYNC1I1	-0.30648	1.55832e-05	-0.326865	8.89819e-08	0.984965	0.0987839	0.100383
97	C10orf67	-0.31273	0.00860357	-0.268466	0.000449558	0.950676	0.367371	0.263992		132	WDR62	-0.48696	3.32309e-06	-0.541918	2.34641e-10	0.965263	0.116414	0.0401668
98	SHC3	-0.338996	0.00800147	-0.371057	4.48271e-05	0.953677	0.111737	0.0990144		133	NUDT4	-0.288657	1.26733e-06	-0.353861	4.0911e-08	0.988229	0.0907367	0.0162998
99	MED13	-0.323384	0.00764965	-0.265878	0.000205418	0.958869	0.0752356	0.203022		134	IGF1	-1.01191	1.14087e-06	-0.954866	9.43893e-08	0.925974	-0.203883	-0.315045
100	KLK4	-0.333616	0.00535898	-0.426236	5.50758e-05	0.942332	0.0503933	0.059245		135	ADA	-0.593251	7.98589e-08	-0.638722	6.33939e-10	0.968342	-0.0232376	-0.0645959
101	LUM	-0.358488	0.00532885	-0.36271	5.14352e-05	0.955463	0.25696	0.0626878		136	FRG1B	-0.381766	4.31193e-10	-0.370685	8.18717e-11	0.985738	0.106299	-0.220518
102	GREB1L	-0.345038	0.00428319	-0.335345	5.02732e-05	0.967881	0.0538582	-0.00635821		137	NOX5	-1.07659	4.72478e-11	-0.79632	1.30353e-13	0.963014	0.0487707	-0.0868537
103	TP53INP2	-0.409298	0.00420716	-0.385196	0.000188733	0.961961	0.375273	0.295786		138	SLITRK4	-1.13043	4.21838e-16	-1.23445	1.00821e-15	0.943858	-0.1145	0.00298715
104	ATP8A2	-0.244437	0.00382196	-0.409276	8.07702e-05	0.95128	0.0407821	0.0317789		139	HSD11B1	-1.60618	6.83276e-17	-1.42252	7.35259e-17	0.91385	-0.232644	-0.104407
105	CYB561	-0.192125	0.00373081	-0.303886	2.65591e-06	0.980924	0.215315	0.146718		140	CADPS	-2.31161	2.95832e-22	-2.16457	6.13487e-17	0.914521	0.00295746	-0.144286
106	COL4A6	-0.339037	0.00368597	-0.280028	0.000112497	0.955917	-0.0401845	0.00877006		141	HSFY2	-12.913	3.75553e-36	-13.5247	9.12498e-20	0.888802	0.115953	Y chrom
107	FAM20A	-0.318186	0.00364163	-0.402148	8.59104e-06	0.96414	-0.033144	0.013671		142	RPS4Y1	-9.00448	4.34256e-37	-8.68449	2.7748e-19	0.925726	-0.34822	Y chrom
108	ARTN	-0.525757	0.00357603	-0.444514	5.14352e-05	0.9329	0.141408	-0.230309		143	KDM5D	-8.89035	4.34117e-37	-8.36073	2.7748e-19	0.92238	0.0743942	Y chrom
109	UPB1	-0.704141	0.00350915	-0.464889	0.000117524	0.935088	0.121855	0.0796023		144	USP9Y	-9.18822	4.23047e-37	-8.18989	2.7748e-19	0.922704	0.227977	Y chrom
110	NRGN	-0.354695	0.00285076	-0.279394	7.77526e-06	0.968716	-0.0559648	-0.0346723		145	EIF1AY	-7.92761	3.90935e-37	-6.88495	2.7748e-19	0.92475	-0.0600337	Y chrom
111	RAP1GAP2	-0.357342	0.00243965	-0.307988	3.27111e-06	0.978307	0.44079	0.228552		146	DDX3Y	-8.57493	3.90935e-37	-7.11682	2.7748e-19	0.918734	0.227099	Y chrom
112	C4B	-0.270531	0.00226225	-0.411543	4.1758e-09	0.974312	0.101485	0.148885		147	UTY	-9.9894	3.8121e-37	-8.52542	2.7748e-19	0.923913	0.154703	Y chrom
113	GREB1	-0.219573	0.00177558	-0.369718	0.000269719	0.958866	0.0558129	-0.0553719		148	NLGN4Y	-8.46075	3.75917e-37	-7.01307	2.7748e-19	0.919535	-0.0211574	Y chrom
114	MKX	-0.47268	0.0012154	-0.328327	0.000214271	0.957631	-0.0621092	-0.152627		149	ZFY	-15.6835	3.00116e-37	-8.55388	2.7748e-19	0.911844	0.0351977	Y chrom
115	SYNM	-0.125501	0.000874639	-0.271931	1.69589e-06	0.985503	0.253818	-0.00862185
